# Supplementary material for: Socioeconomic Status and Clinical Outcomes in Chronic Kidney Disease: Bootstrap Validation of a Simple Indicator
Source: MDPI journal article supplement (doi:10.3390/jcm13123600), 2024-06-20
Supplement: s1 [file s1]

## Supplementary Table S1. Baseline characteristics of included and excluded patients

|                                  | Excluded (n=198) | Included (n=561) | p-value |
|----------------------------------|------------------|------------------|---------|
| Age, year                        | 63± 9            | 61± 11           | 0.343   |
| Male gender, %                   | 58%              | 61%              | 0.533   |
| Smoking, %                       | 51%              | 49%              | 0.661   |
| <i>Alcohol use, %</i>            |                  |                  |         |
| no                               | 69%              | 68%              | 0.908   |
| current                          | 26%              | 26%              |         |
| former                           | 5%               | 6%               |         |
| Diabetes, %                      | 41%              | 33%              | 0.040   |
| Haemoglobin, g/dL                | 12.5± 1,8        | 12.9± 1,8        | 0.002   |
| Total cholesterol, mg/dL         | 183± 46          | 188± 44          | 0,226   |
| Systolic blood pressure, mmHg    | 136± 18          | 133± 18          | 0.014   |
| CRP high sensitivity, mg/L       | 2.7 (1.3-6.8)    | 2.2 (1-5)        | 0.009   |
| Phosphate mg/dL                  | 3.8± 0,8         | 3.7± 0.7         | 0.635   |
| eGFR, ml/min/1.73 m <sup>2</sup> | 35± 14           | 36± 13           | 0.191   |

Data are mean and standard deviation, median and interquartile range, or absolute number and percentage, as appropriate.

## Supplementary Table S2

PATIENT'S ID \_\_\_\_\_

Date \_\_\_\_/\_\_\_\_/\_\_\_\_

**Do you carry out work activities?**

☐ YES

☐ NO

**Are you retired from work?**

☐ YES

☐ NO

**Please indicate the number of cohabitants** \_\_\_\_\_

**Please indicate the number of cars of your family/cohabitants** \_\_\_\_\_

**Please indicate the highest educational level**

☐ Illiterate

☐ Elementary school

☐ Middle school

☐ High school

☐ University degree
